# Supplementary material for: Using Plasmodium knowlesi as a model for screening Plasmodium vivax blood-stage malaria vaccine targets reveals new candidates
Source: PLoS Pathog. 2021 Jul 1;17(7):e1008864. doi: 10.1371/journal.ppat.1008864 (PMC8279373; doi:10.1371/journal.ppat.1008864)
Supplement: S3 Table — Details of PCR cycle temperatures and times for generation of Plasmodium knowlesi knockout and gene replacement constructs. (XLSX) [file ppat.1008864.s018.xlsx]

## Sheet: Sheet1
PCR Programs used
PCR_Program	step	Temperature (Celcius)	Time
KAP18C6M	1	95	5 min
	2	98	20 sec
	3	54	20 sec
	4	72	6 min
	5	cycle to step for 18 more times
	6	72	10 min
	7	4	forever		oC
KAP18C5M	1	95	5 min
	2	98	20 sec
	3	54	20 sec
	4	72	5 min
	5	cycle to step for 18 more times
	6	72	10 min
	7	4	forever
KAPA18C	1	95	5 min
	2	98	20 sec
	3	54	20 sec
	4	72	01:15 min
	5	cycle to step for 18 more times
	6	72	10 min
	7	4	forever
KAPA2M	1	95	5 min
	2	98	20 sec
	3	54	20 sec
	4	72	01:15 min
	5	cycle to step for 35 more times
	6	72	10 min
	7	4	forever
KAP121M	1	95	5 min
	2	98	20 sec
	3	54	1 Min
	4	72	5 min
	5	cycle to step for 18 more times
	6	72	10 min
	7	4	forever
